# Supplementary material for: Antibiotic-Induced Shifts in Fecal Microbiota Density and Composition during Hematopoietic Stem Cell Transplantation
Source: PubMed Central journal article supplement (PMC6704593; doi:10.1128/iai.00206-19), 2019-08-21

# Patient 1

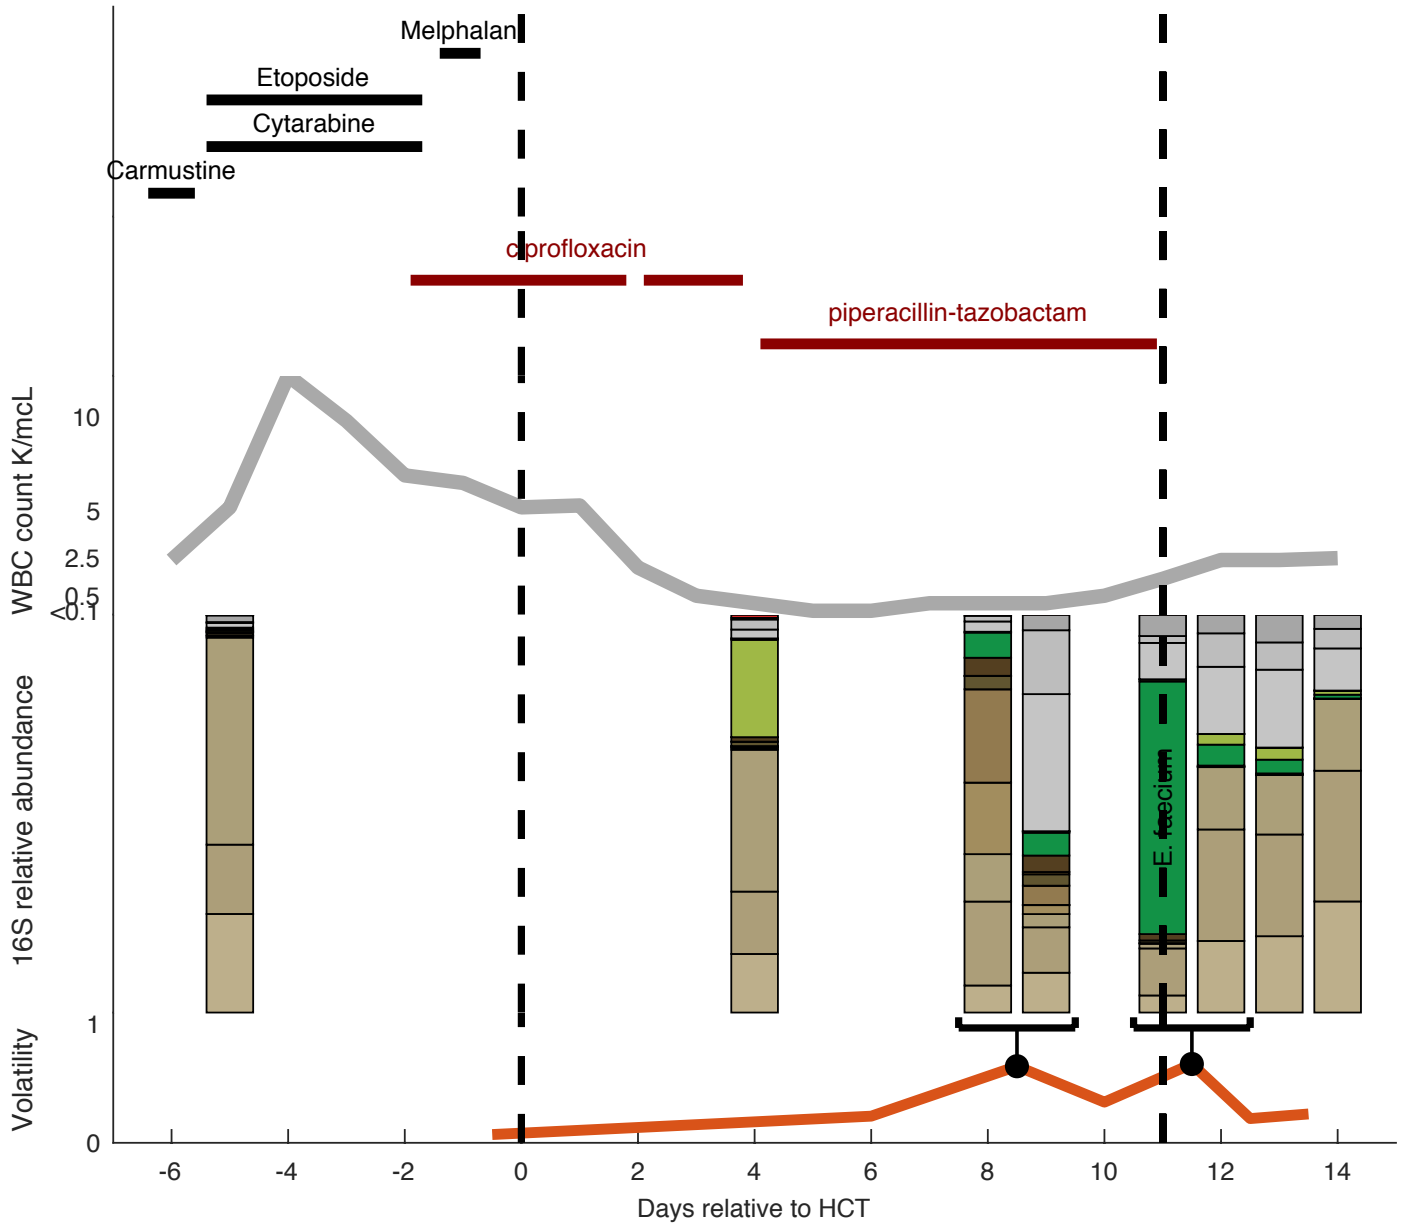

# Patient 2

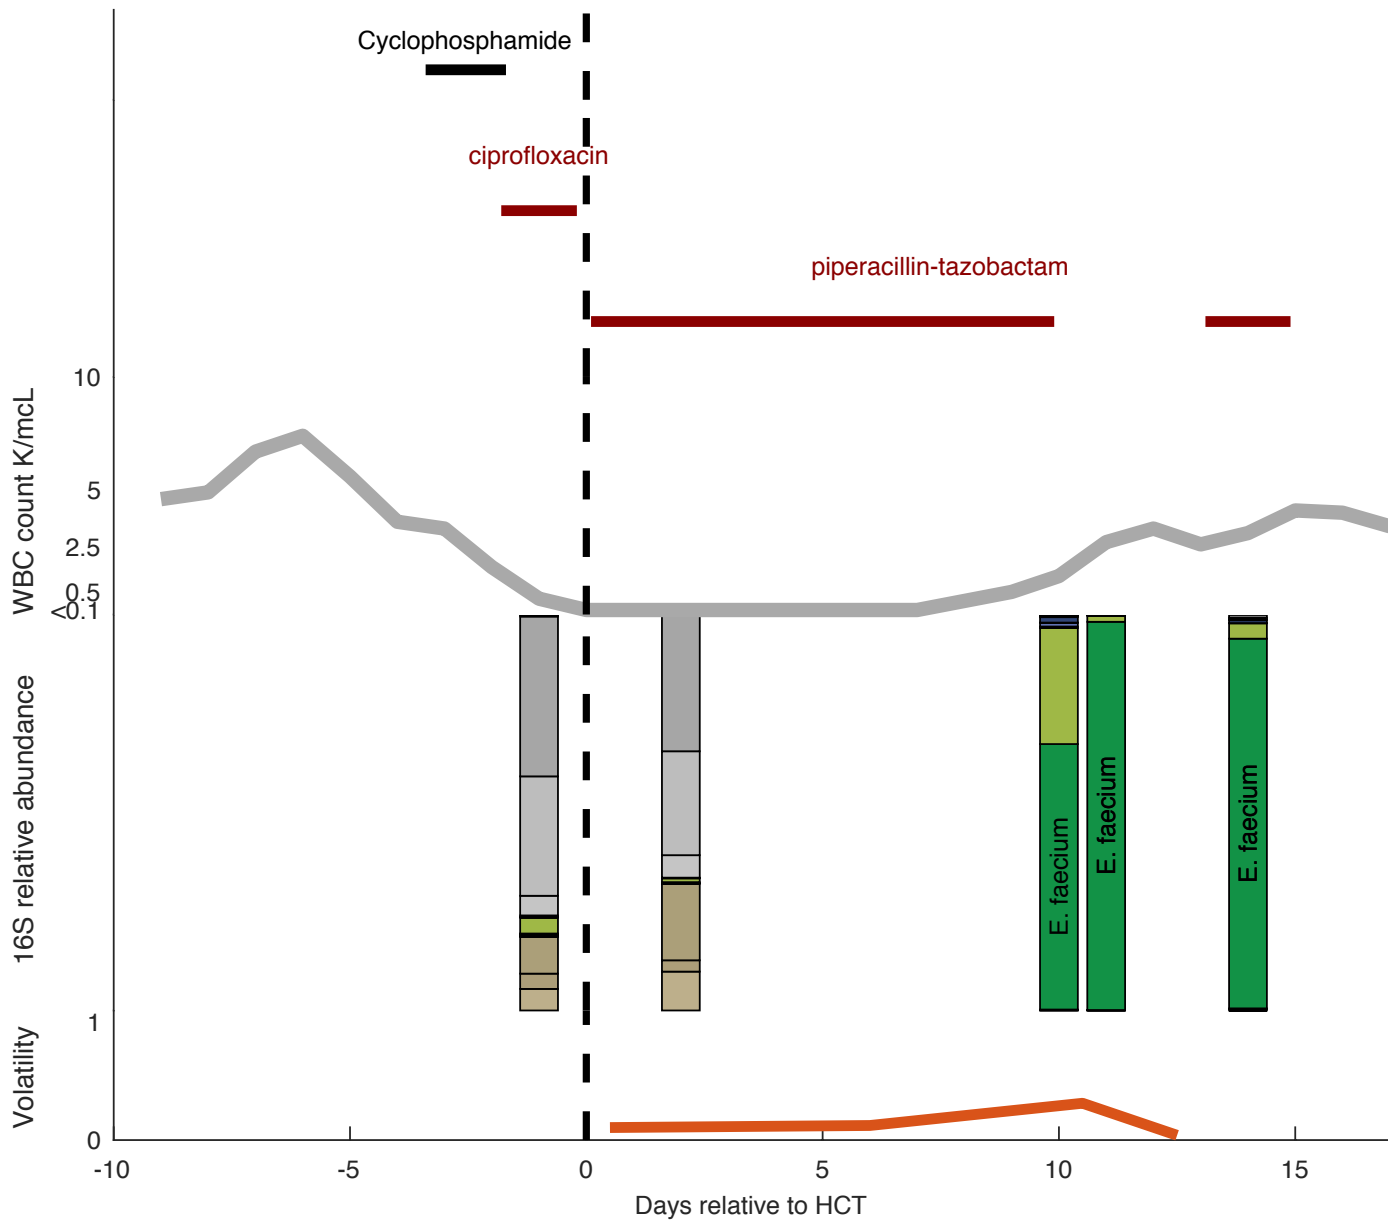

# Patient 3

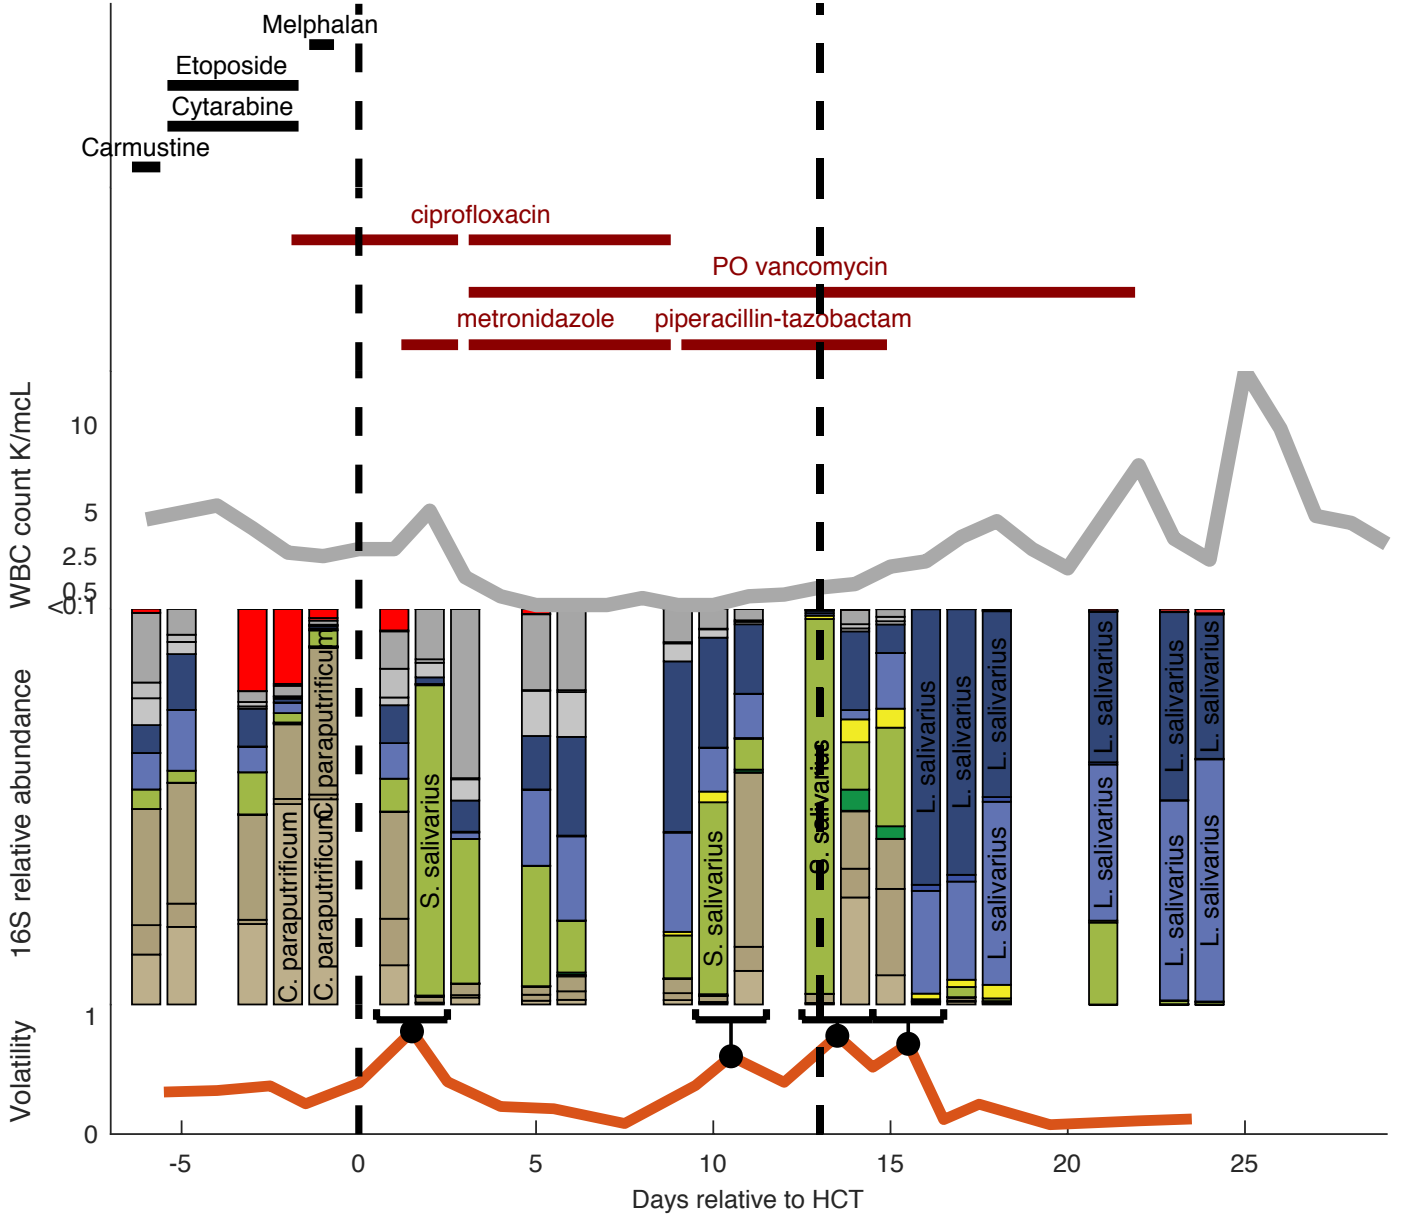

# Patient 15

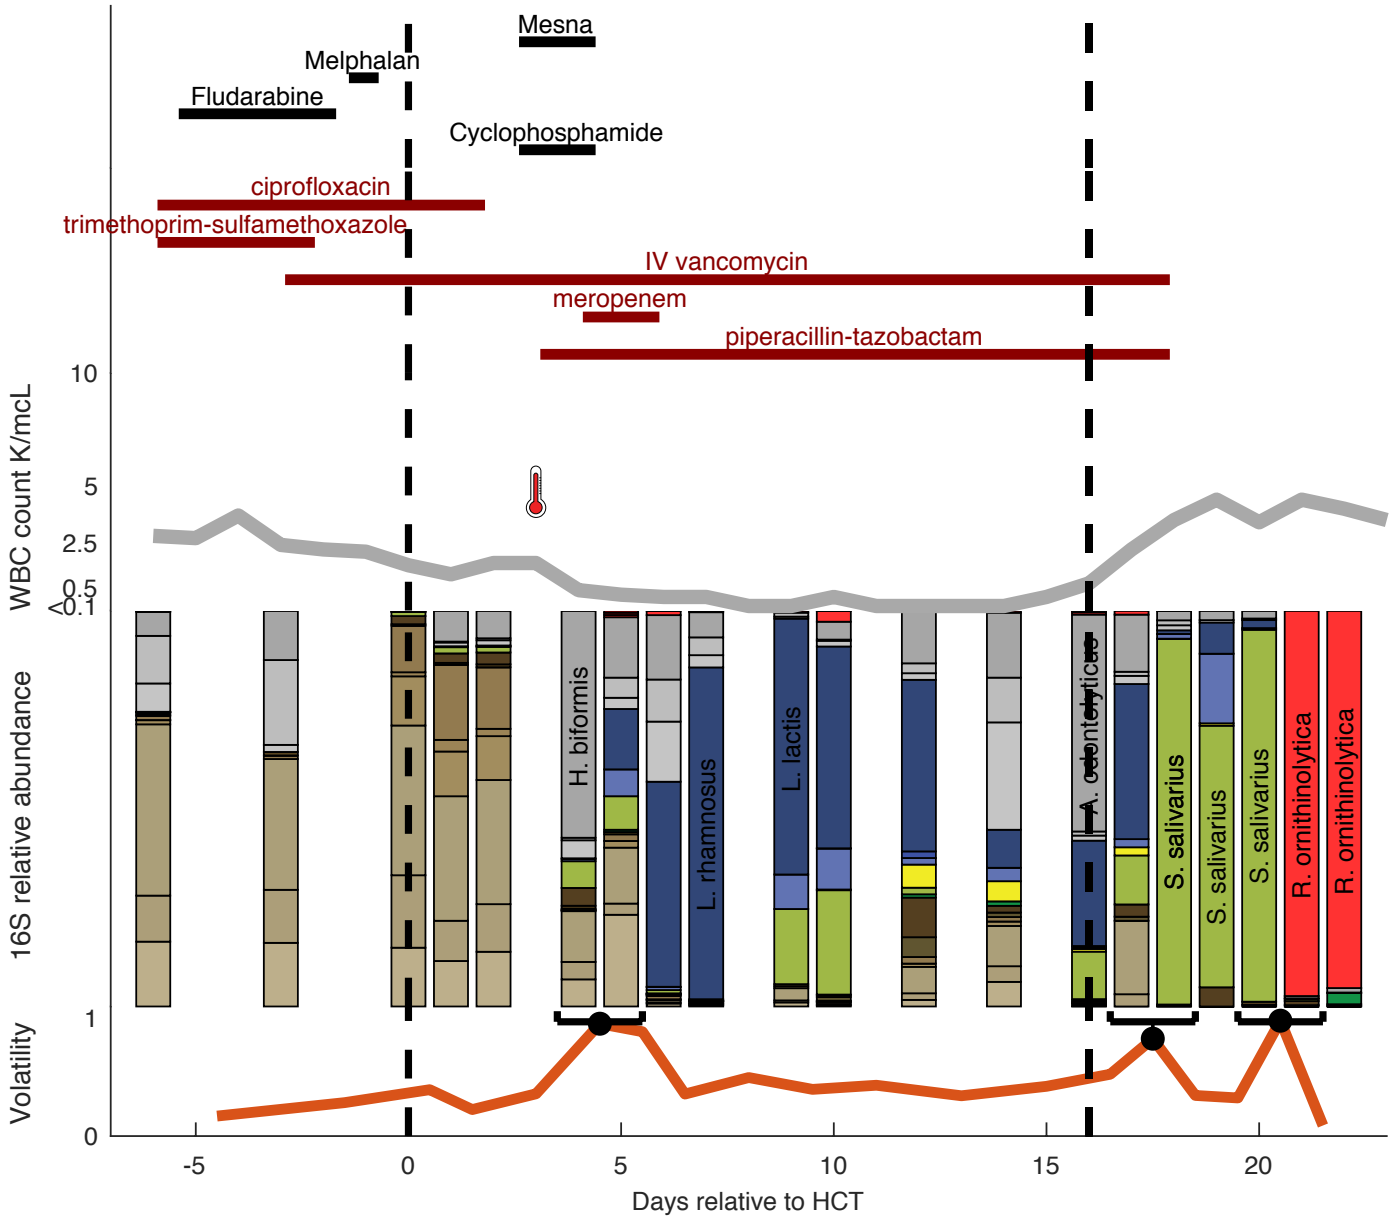

# Patient 5

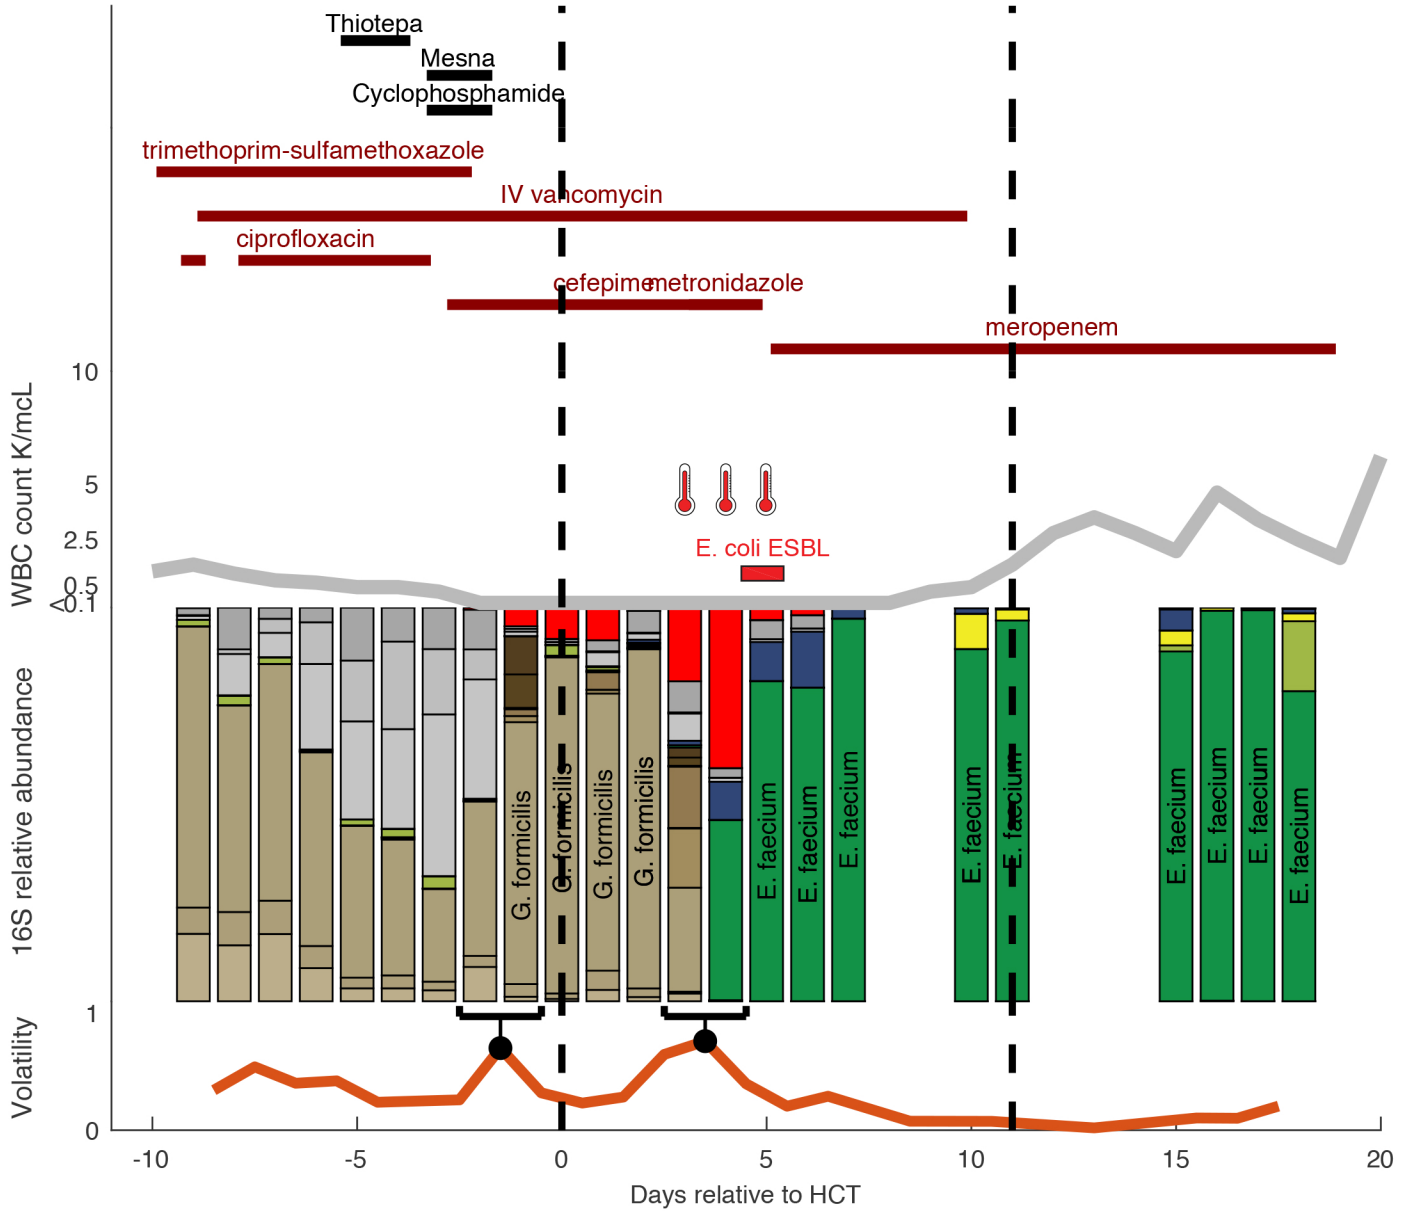

# Patient 6

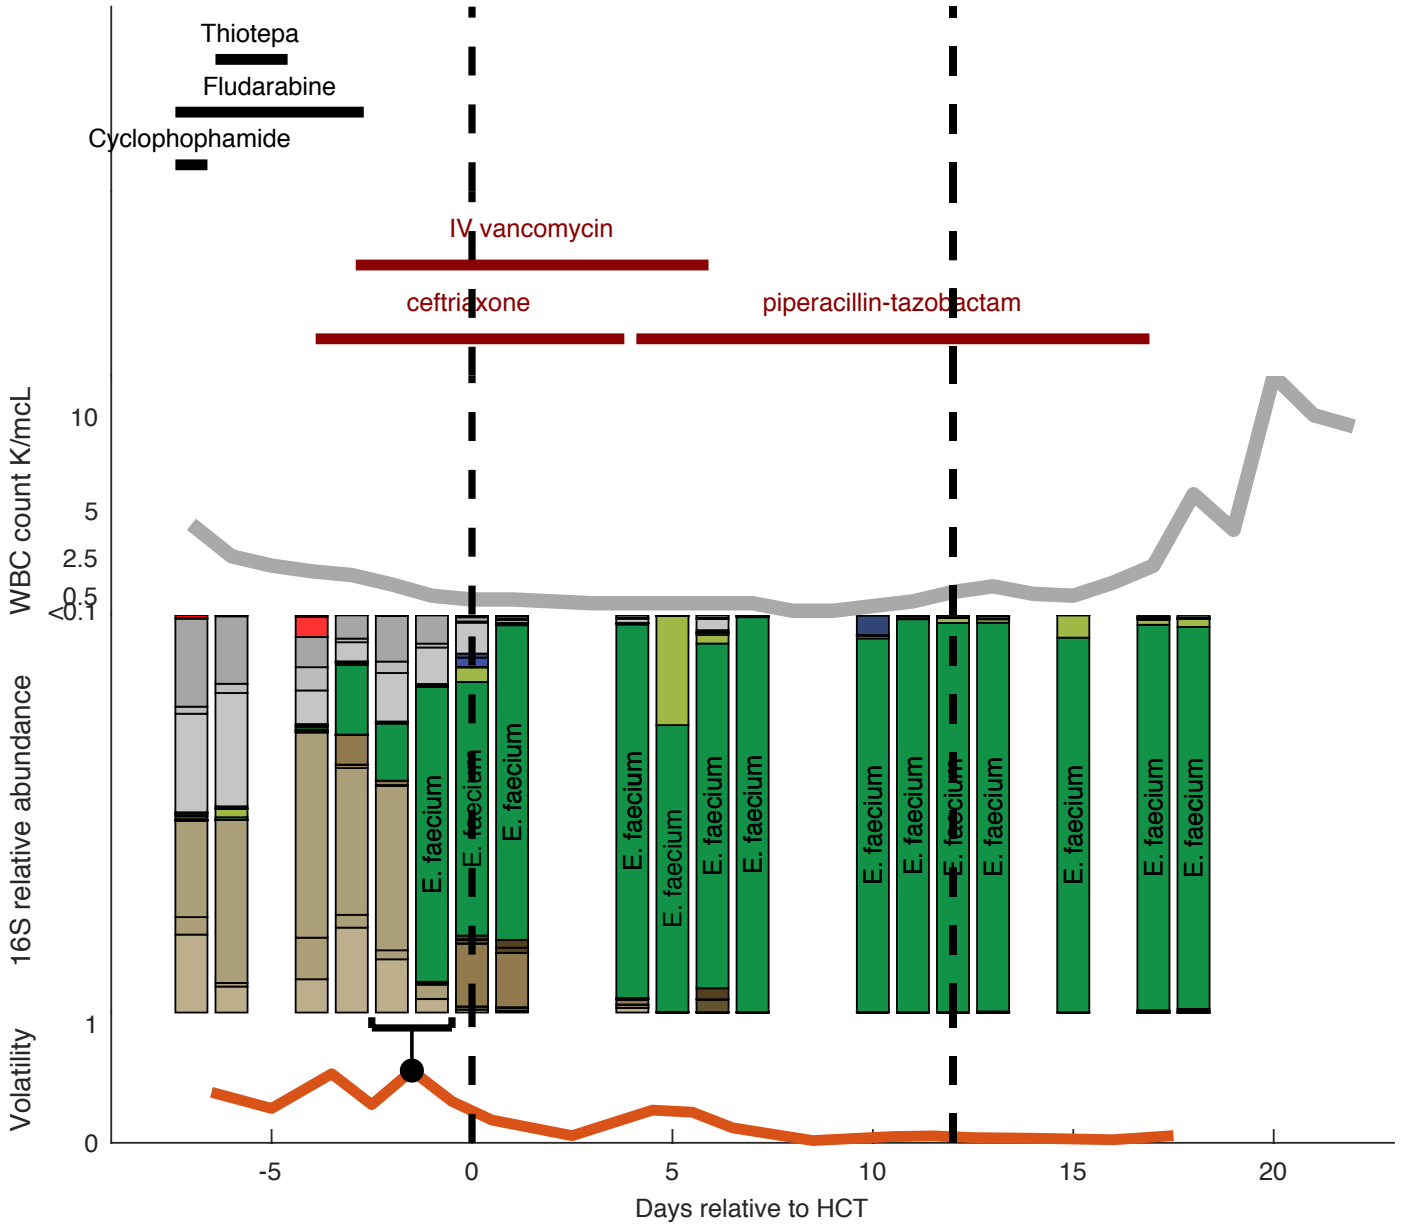

# Patient 7

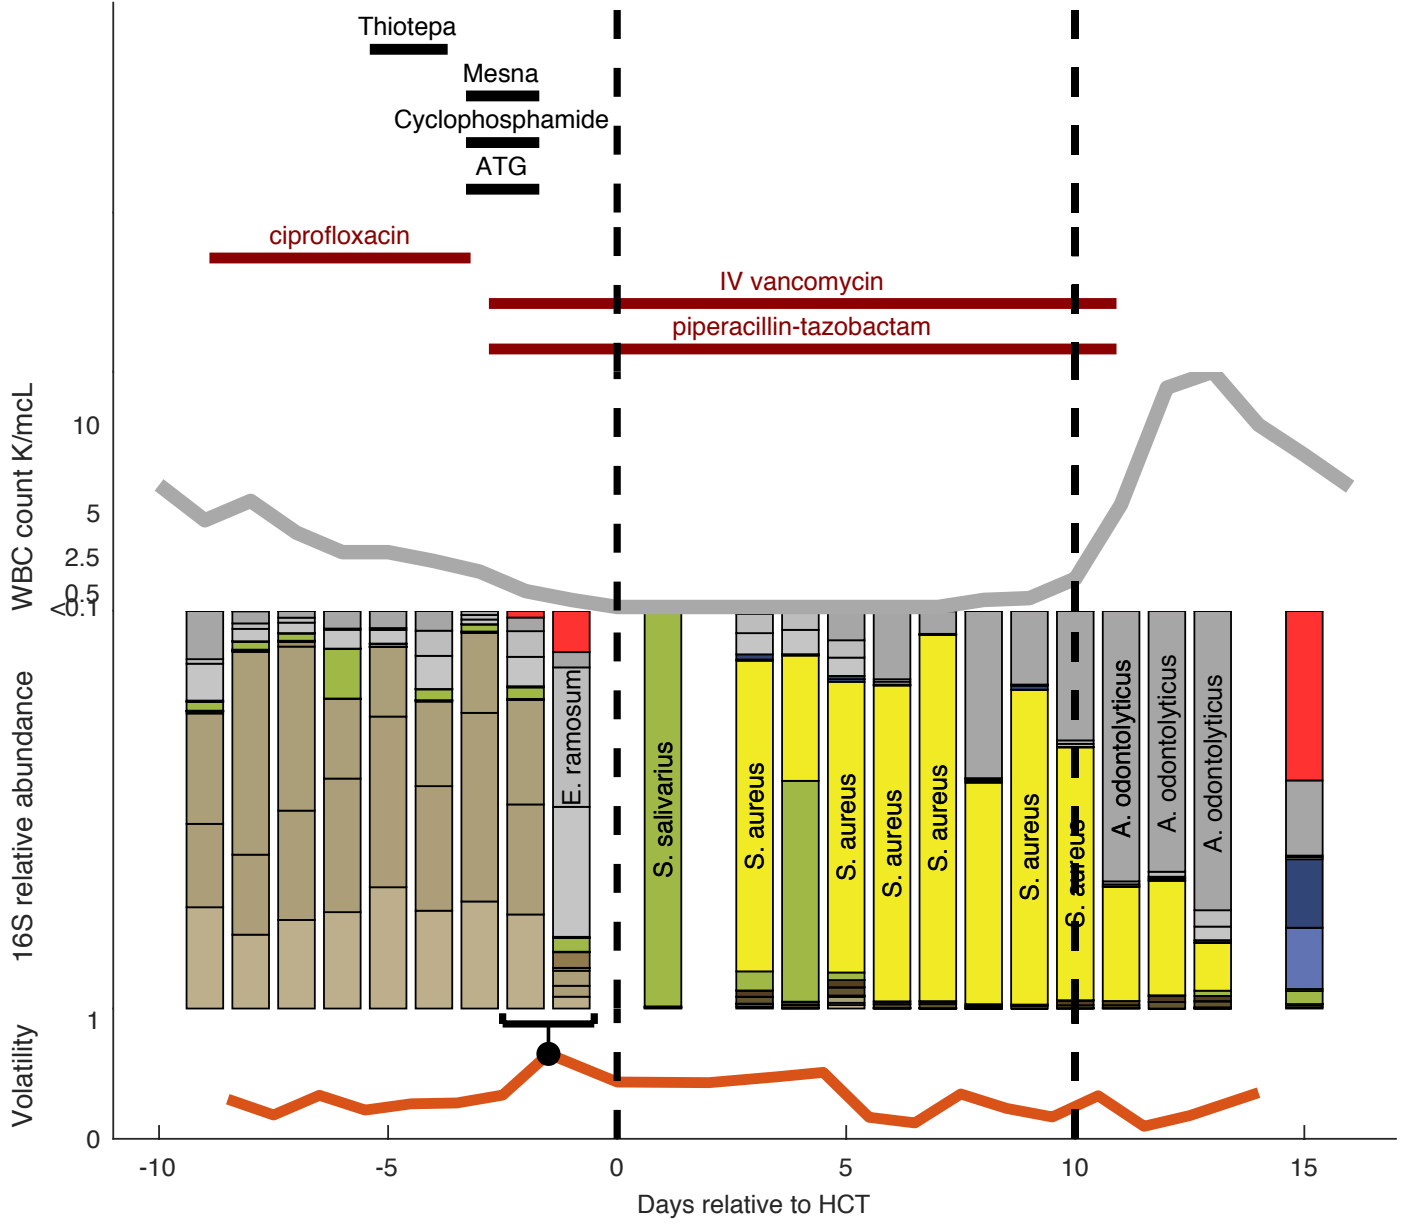

# Patient 8

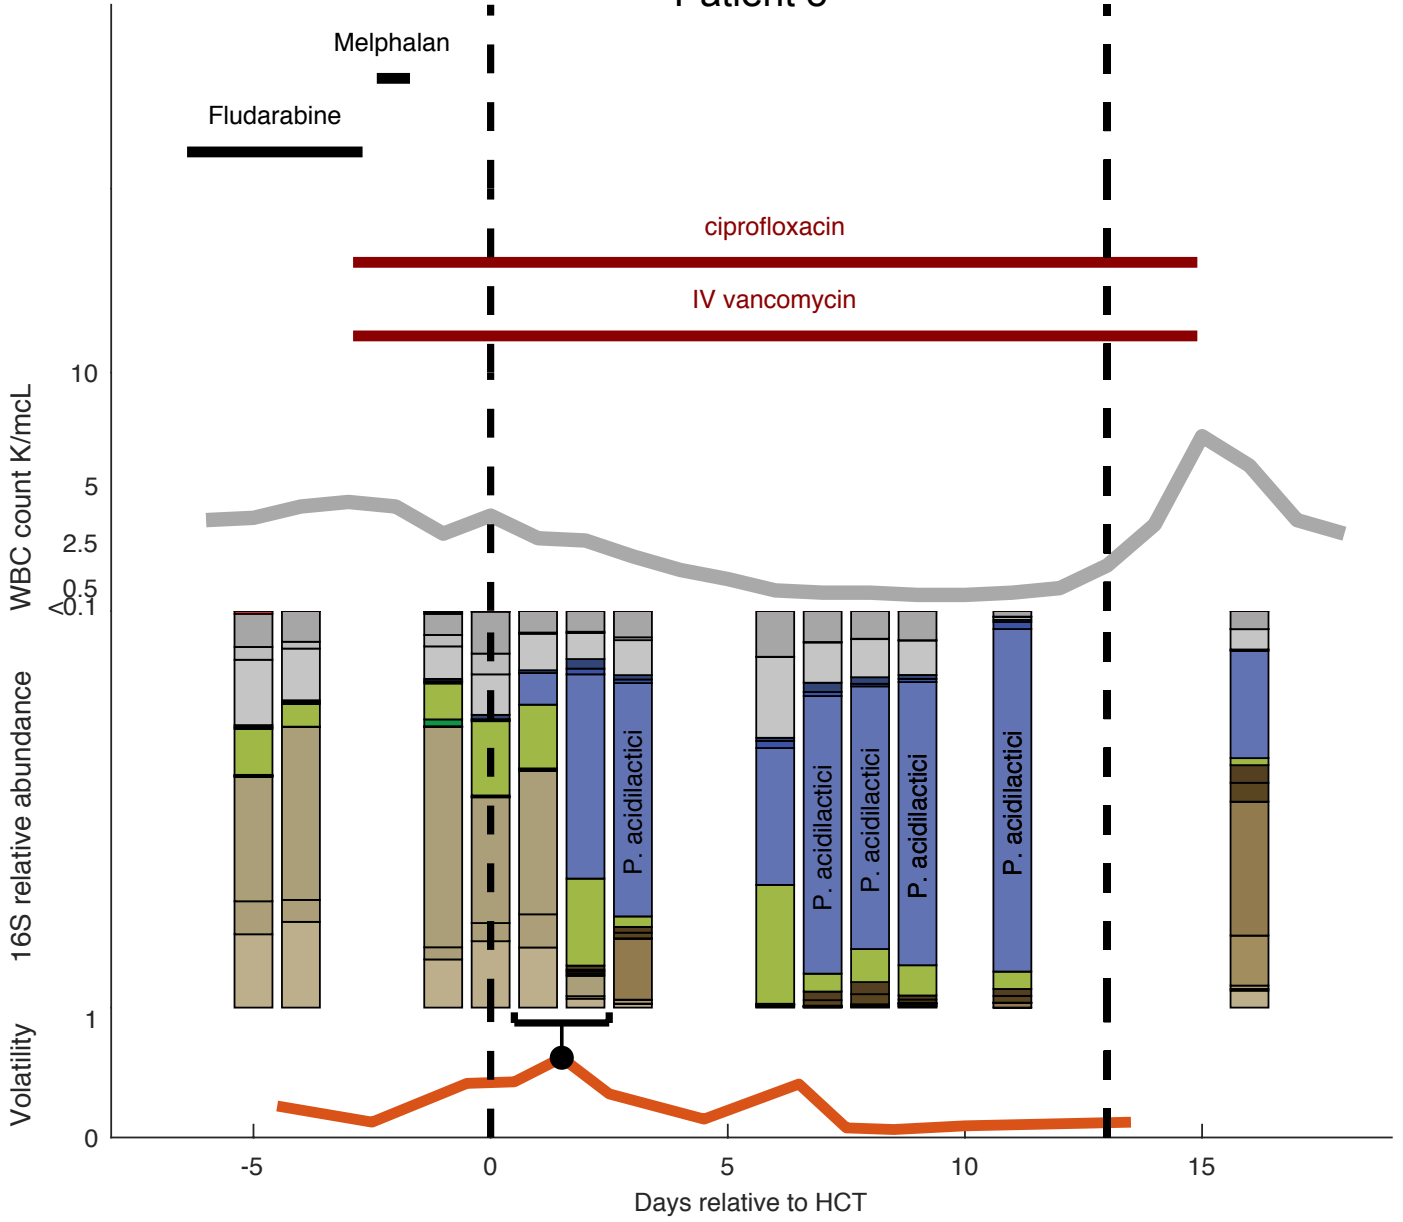



# Patient 9

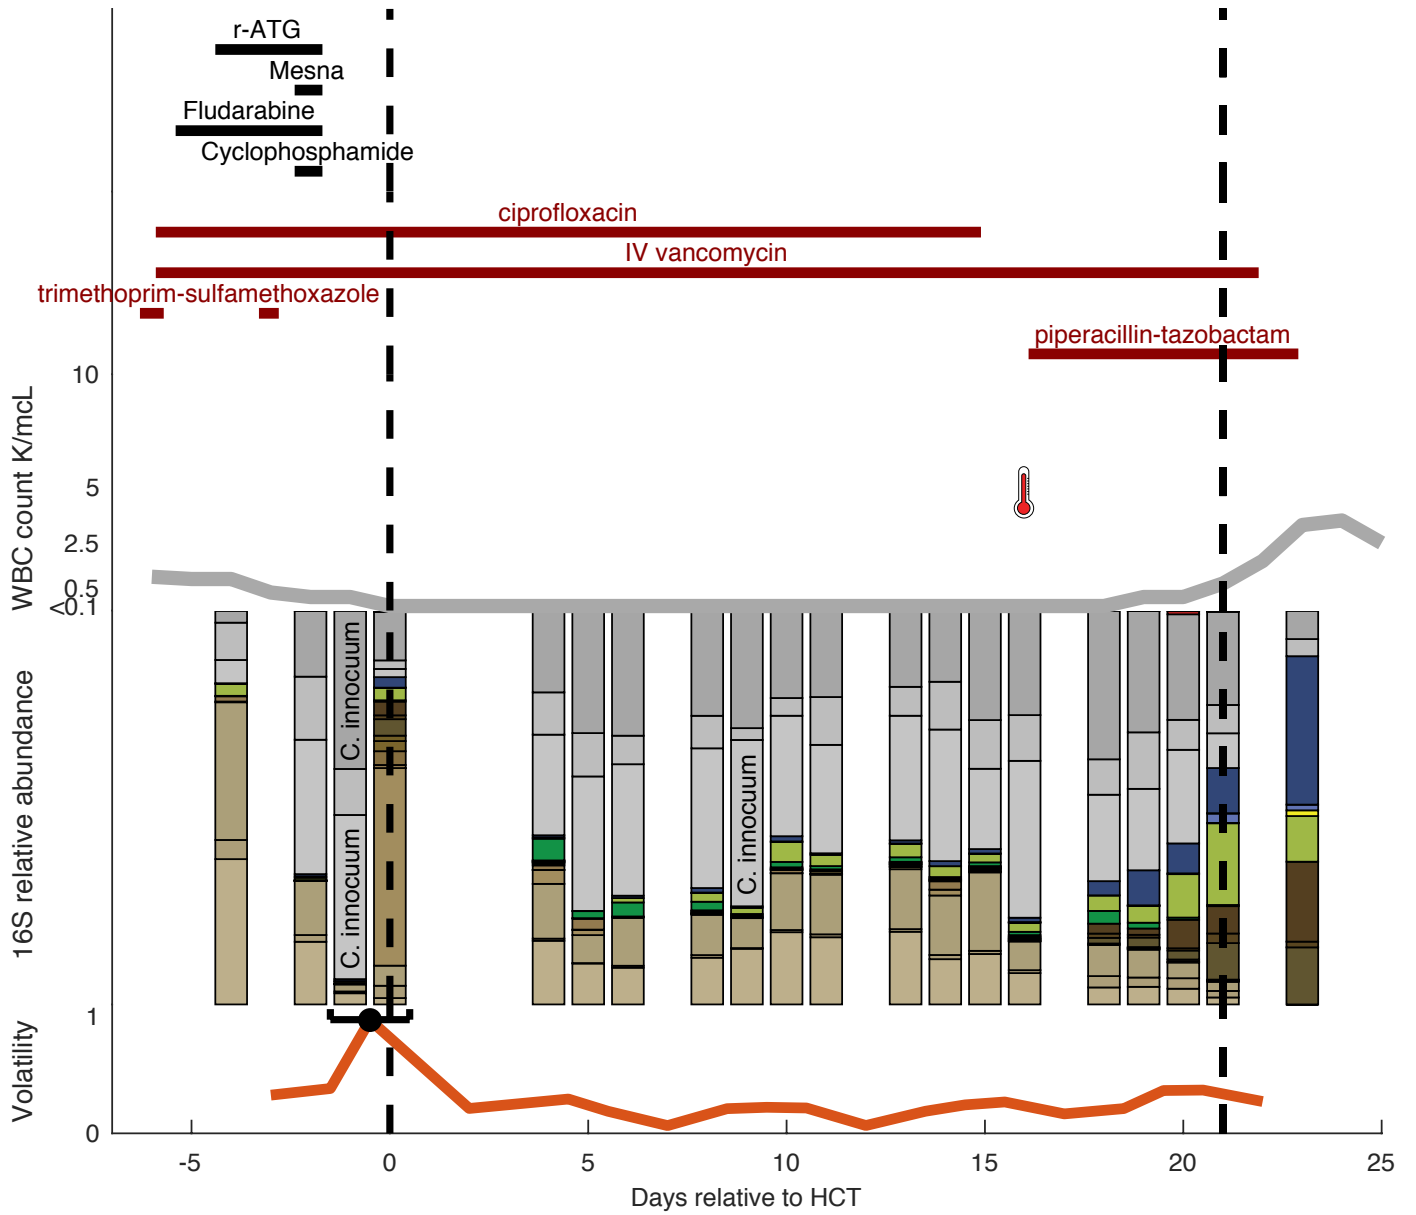

# Patient 10

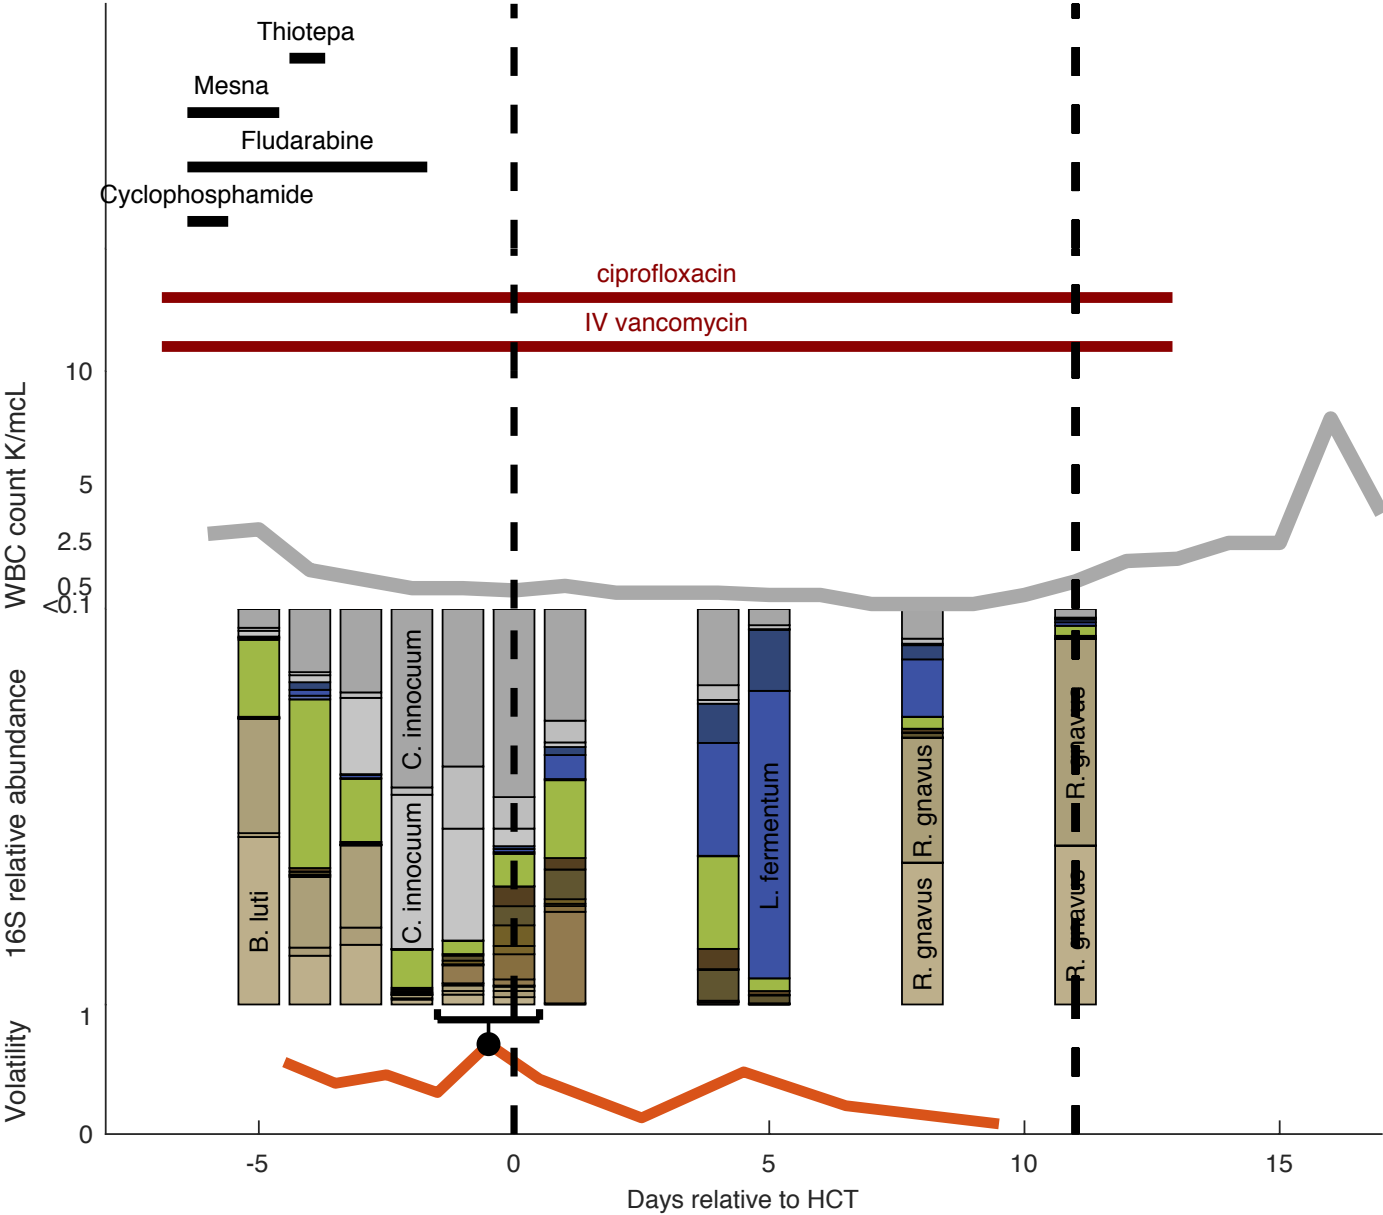

# Patient 11

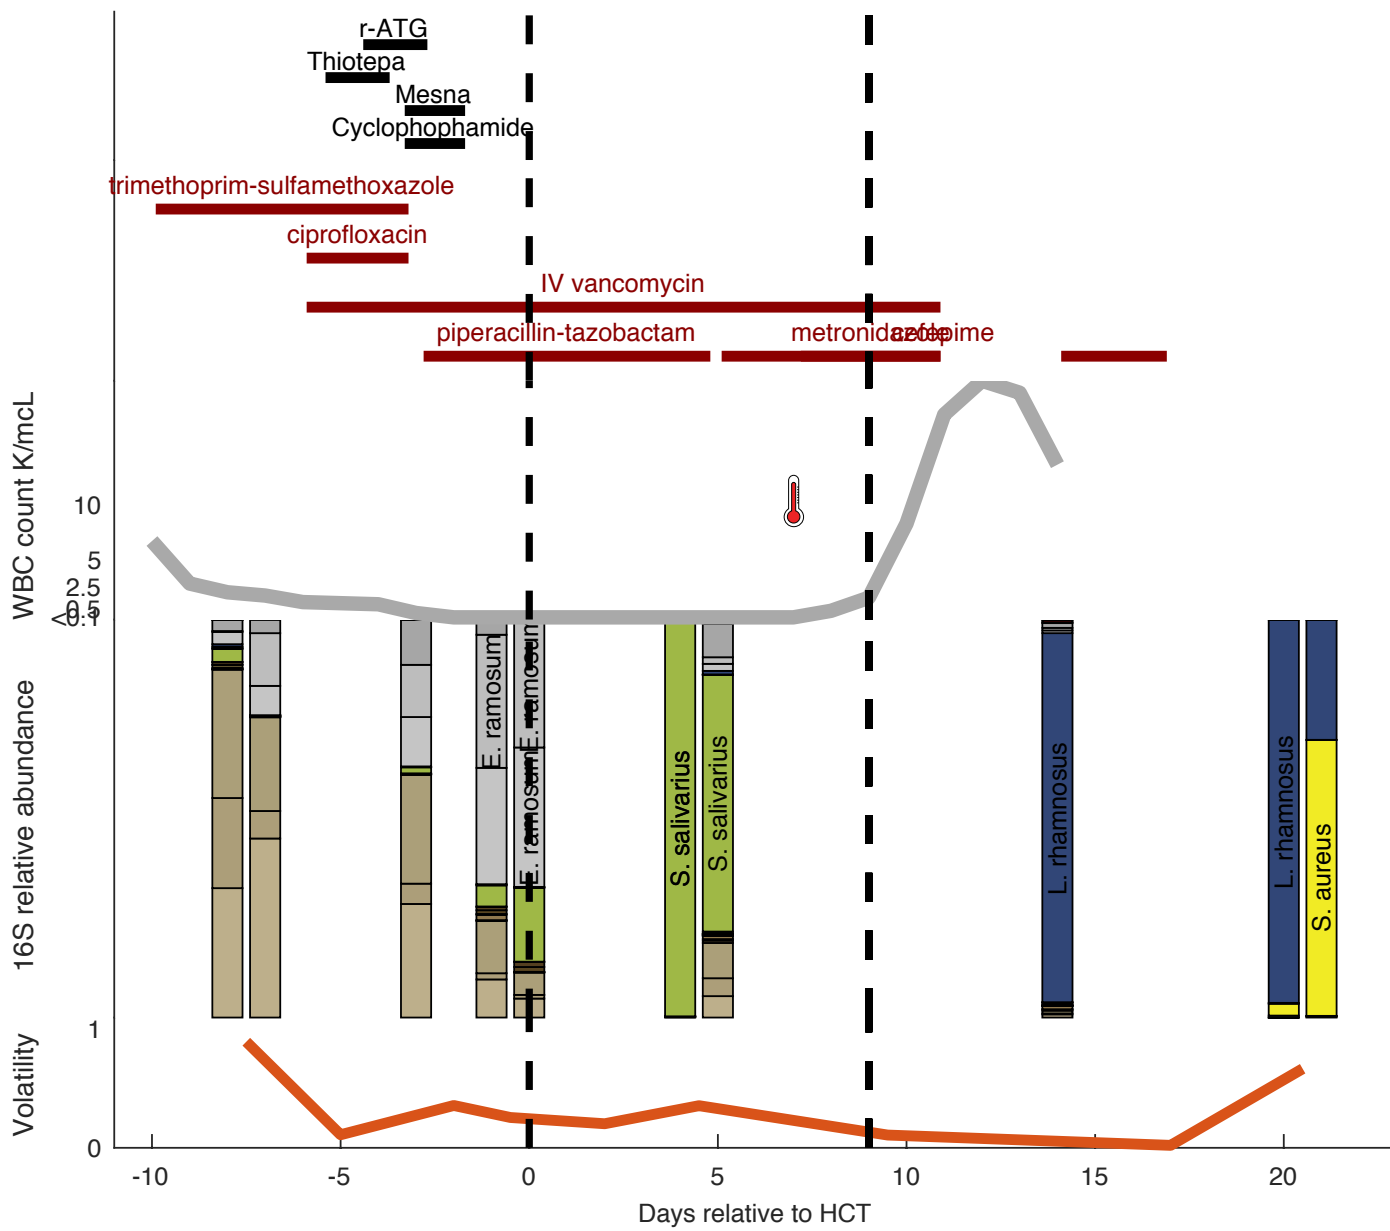

# Patient 12

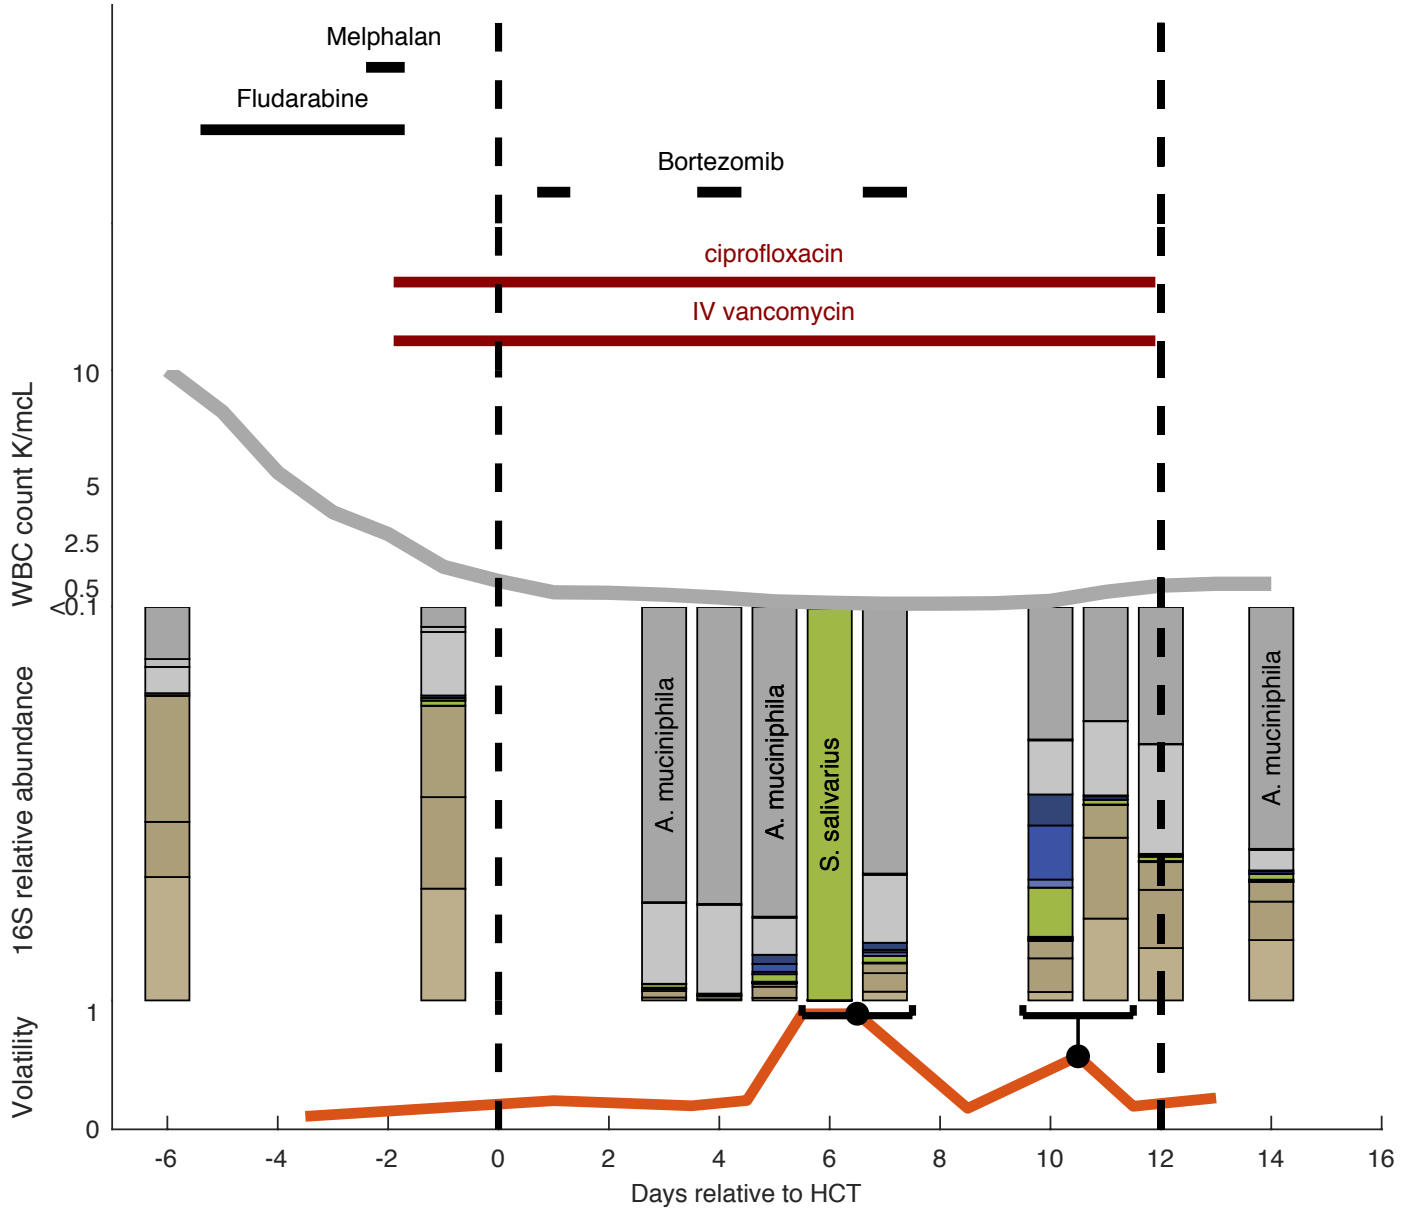

# Patient 13

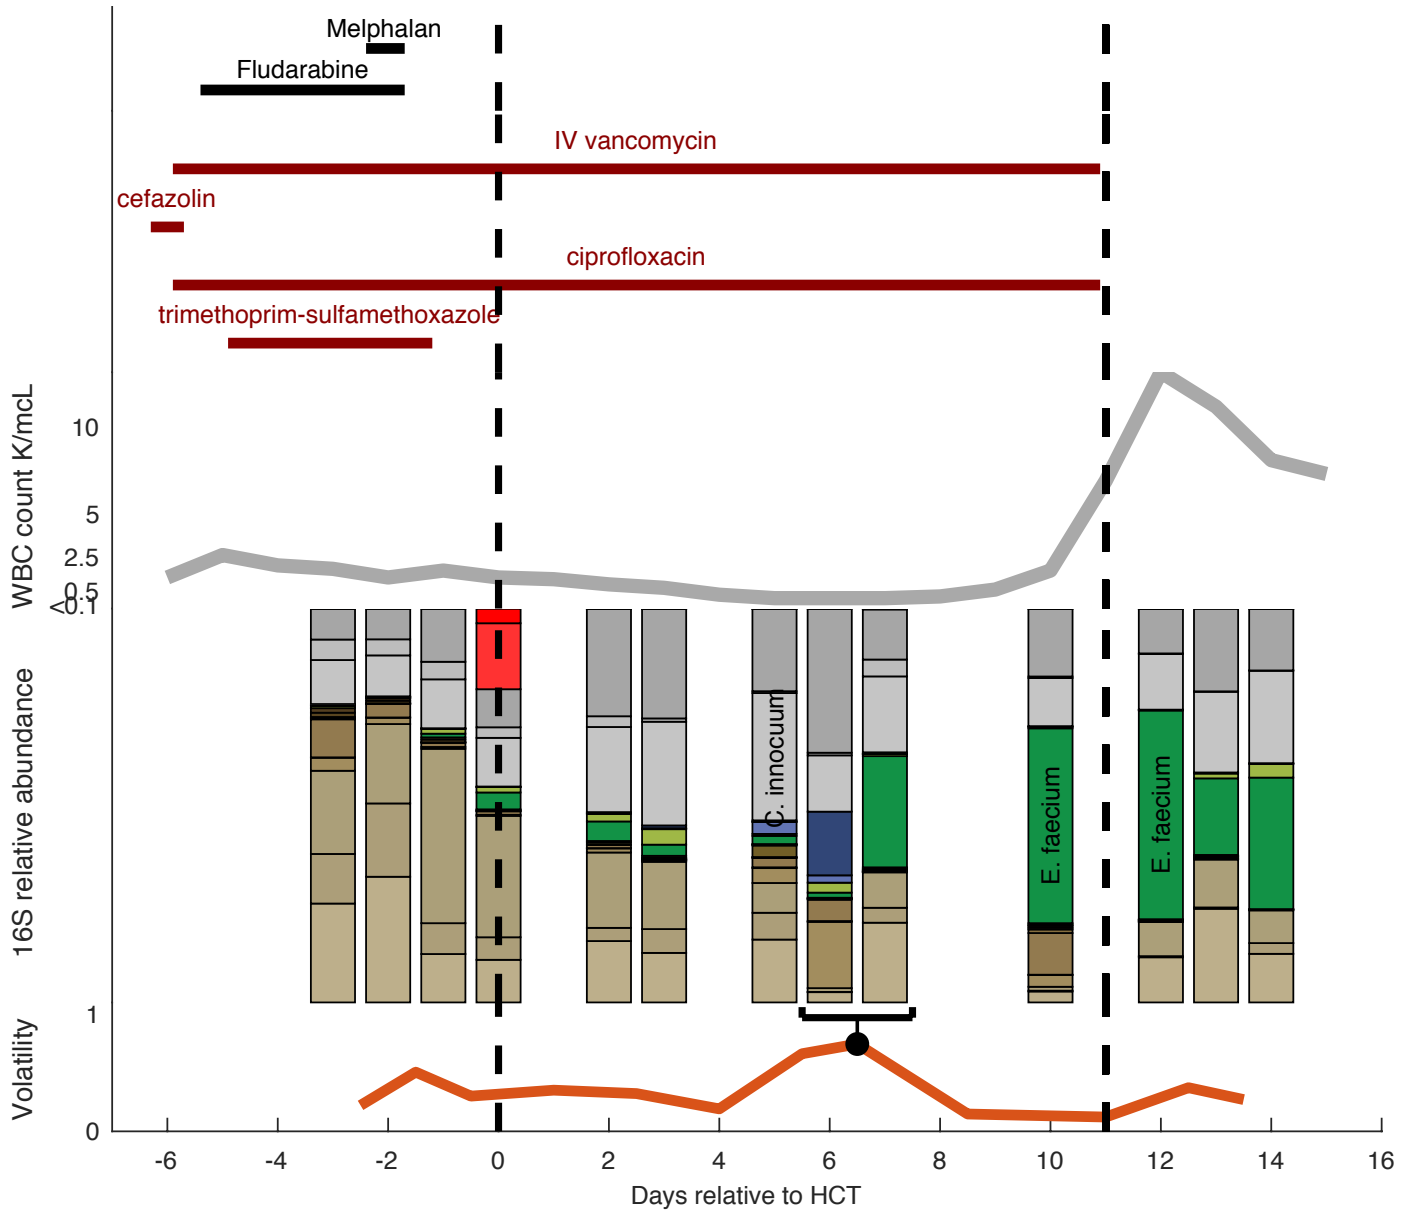

# Patient 14

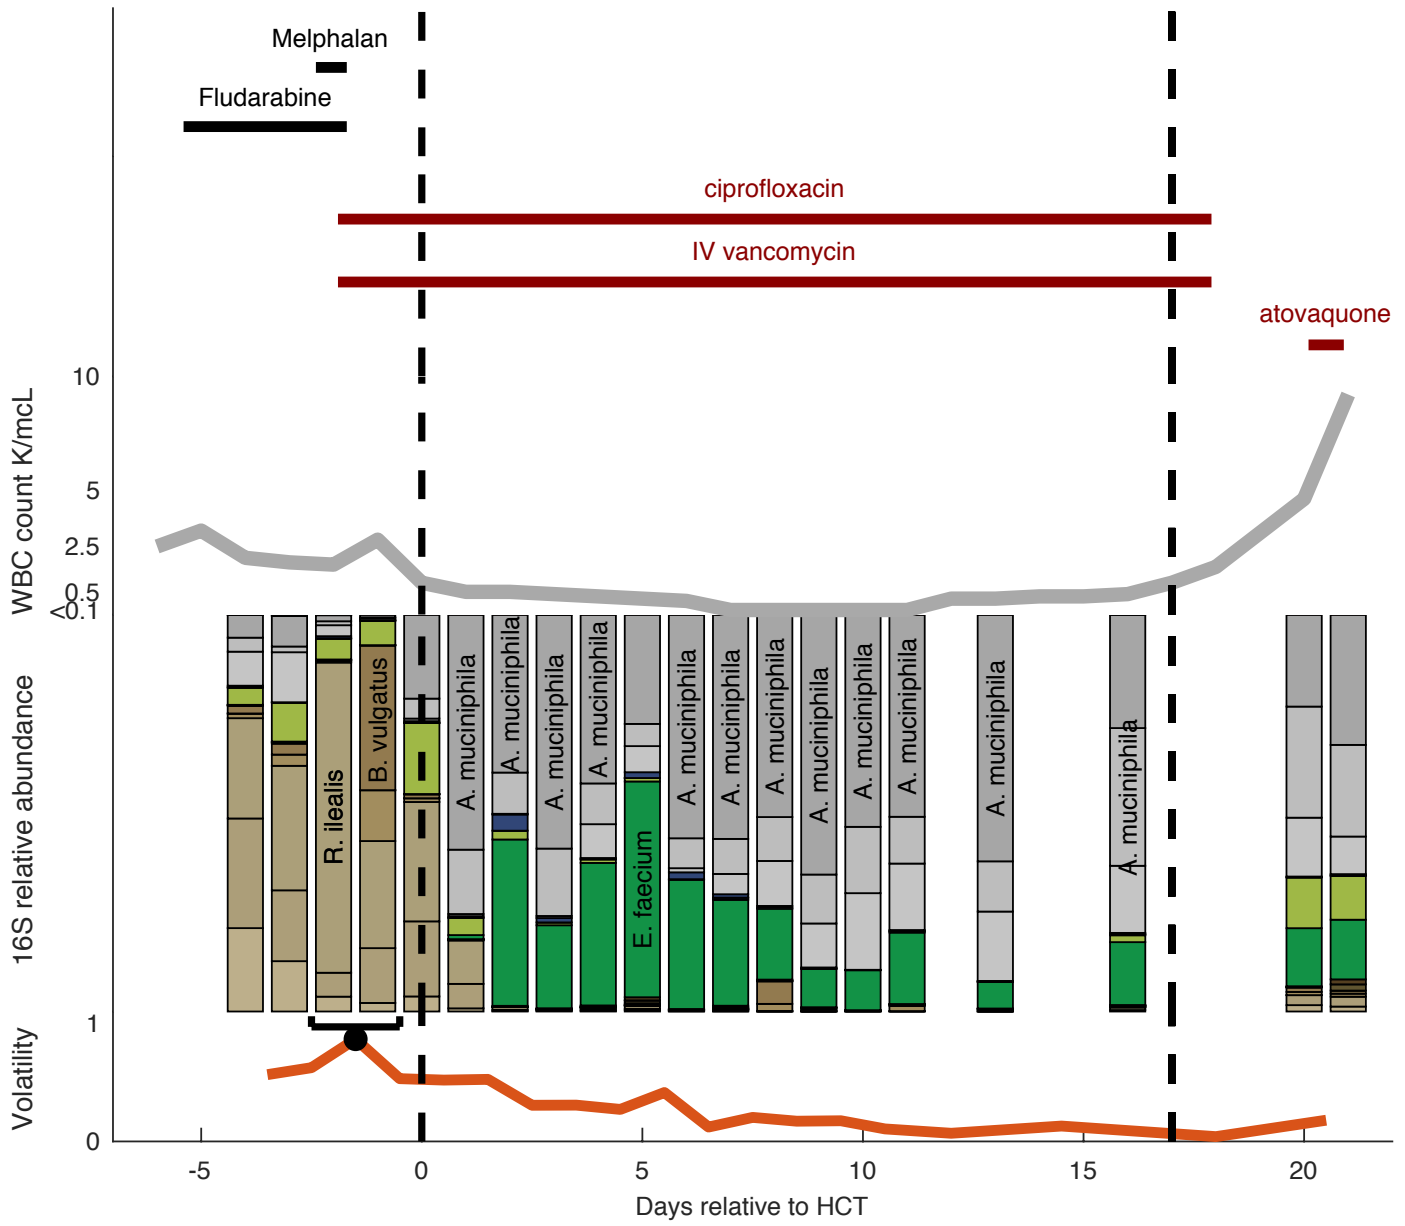

# Patient 4

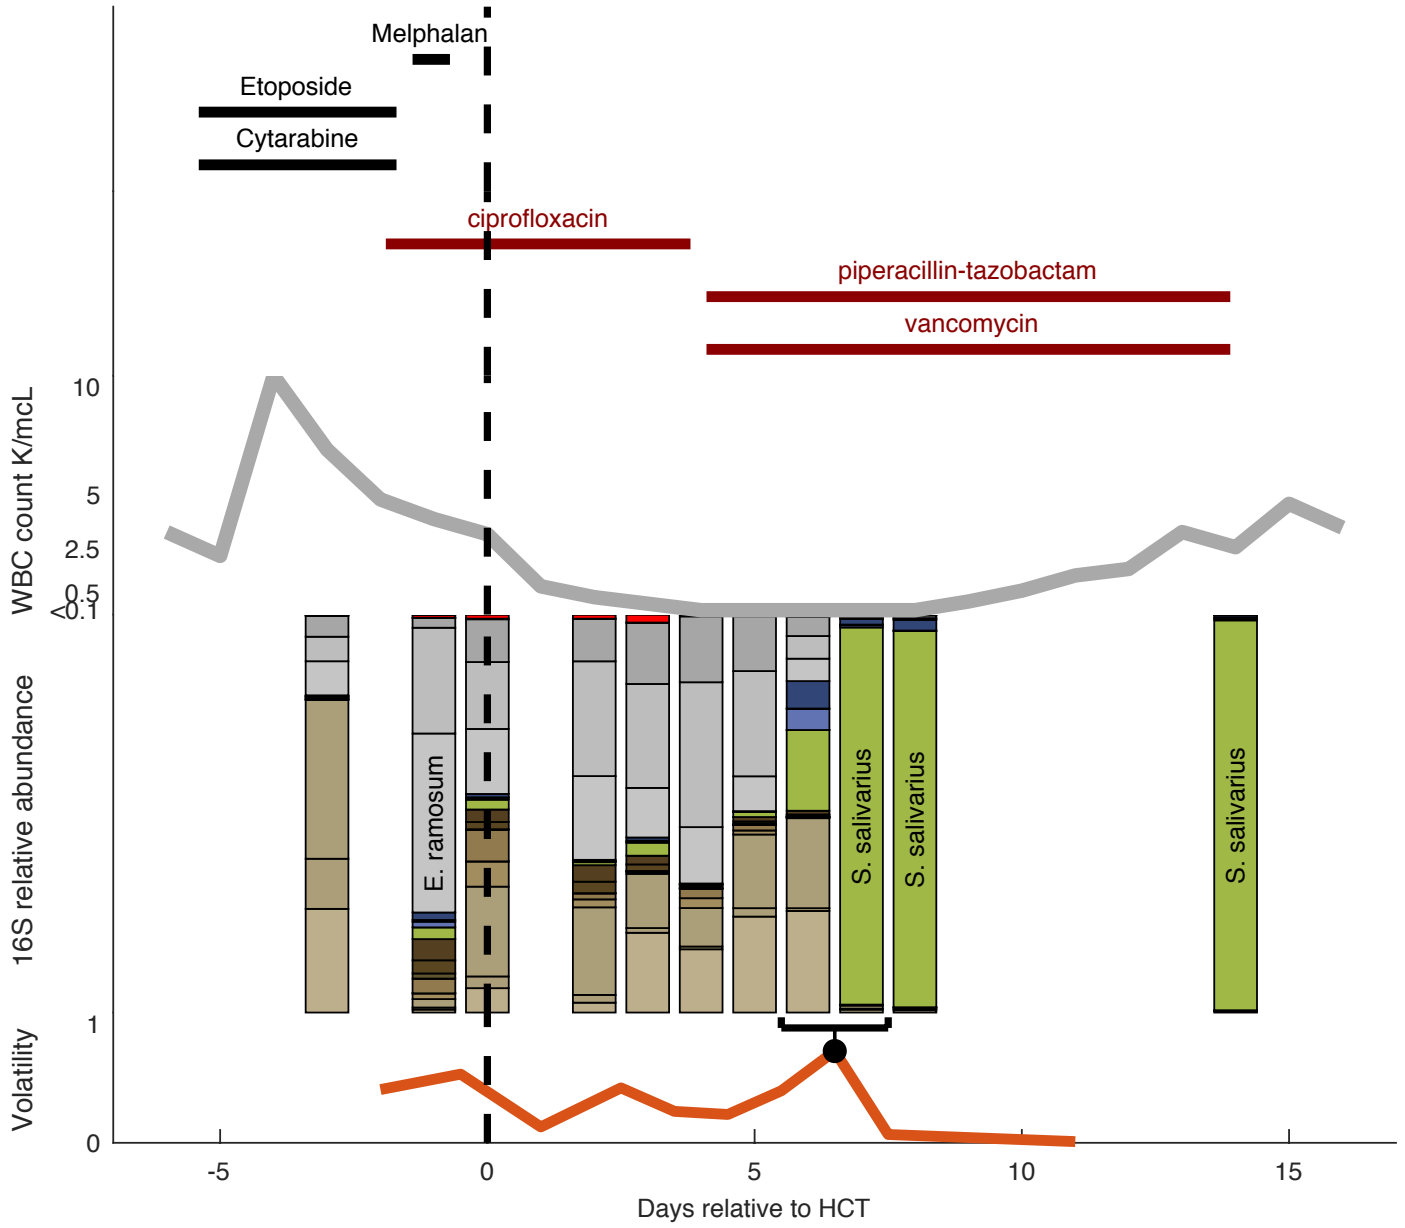

# Patient 16

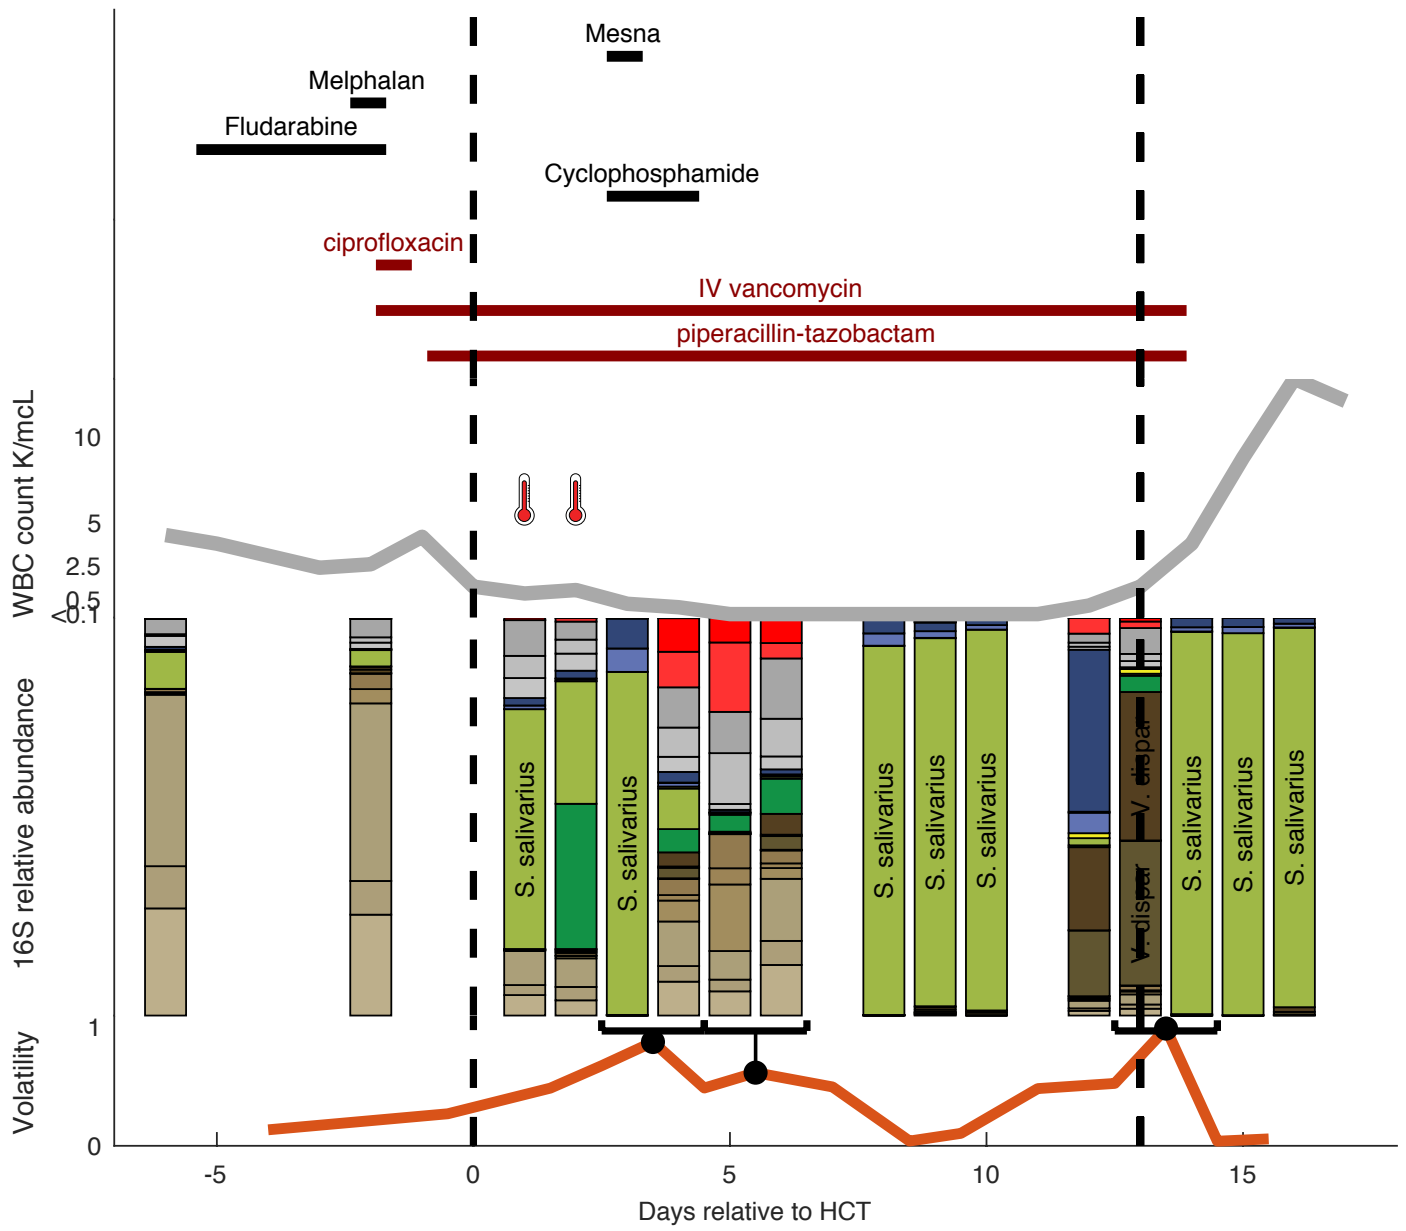



# Patient 17

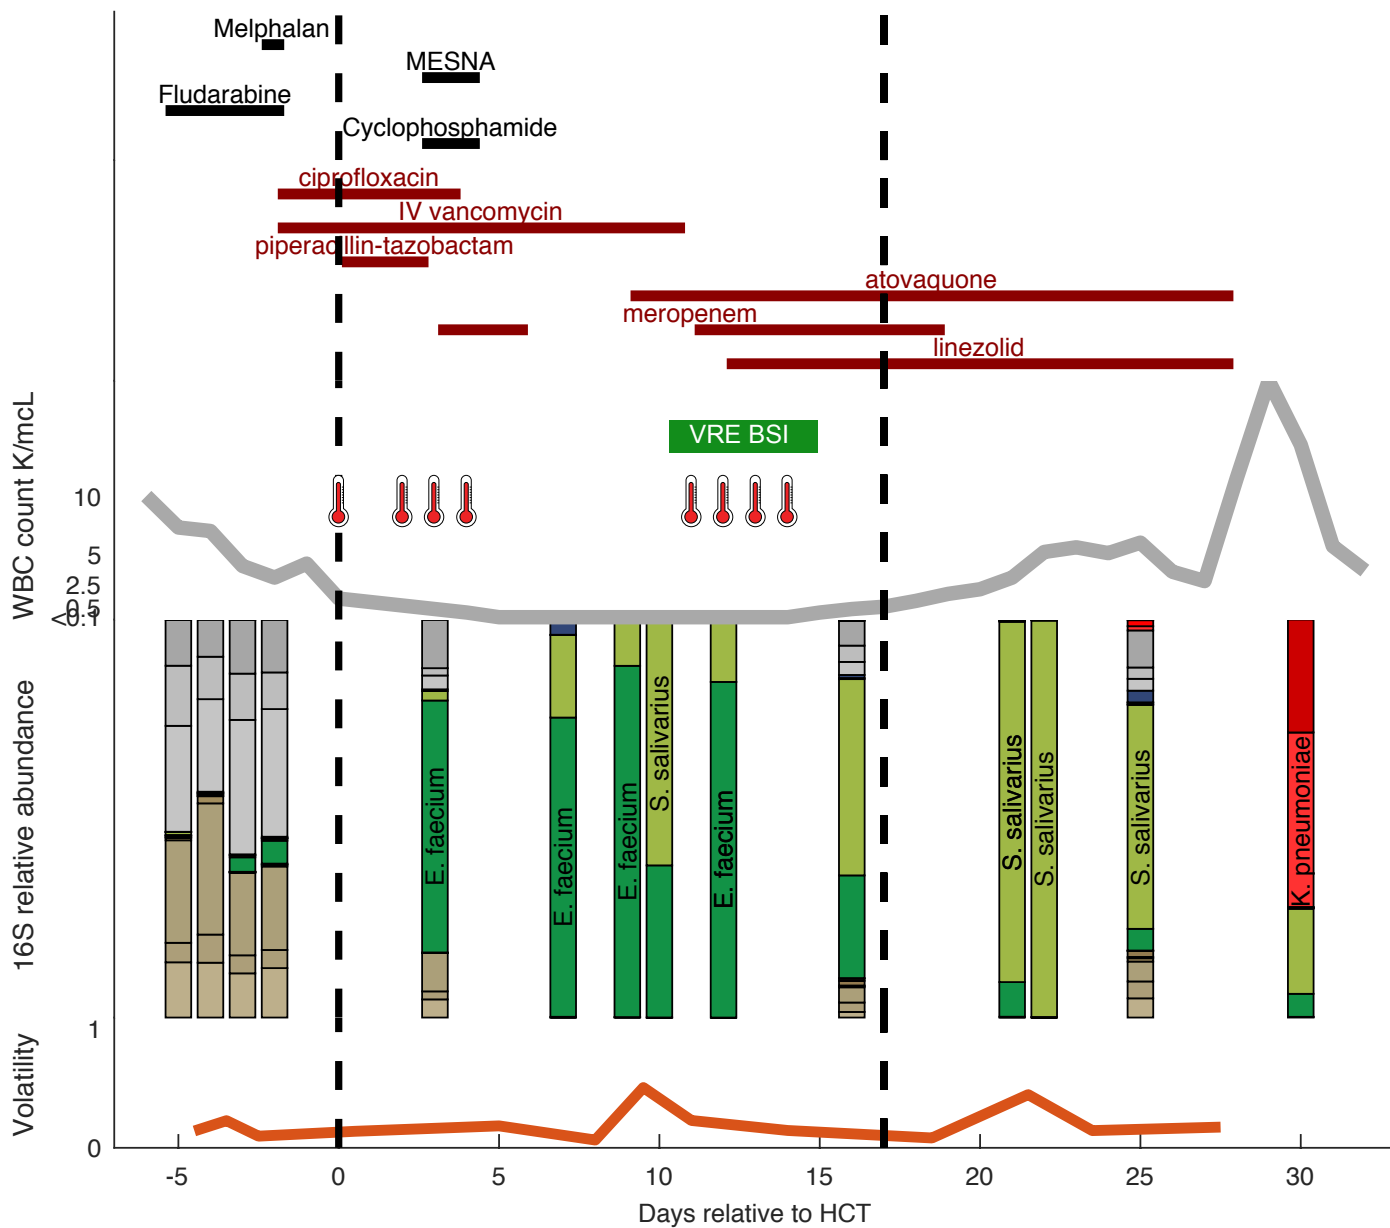

# Patient 18

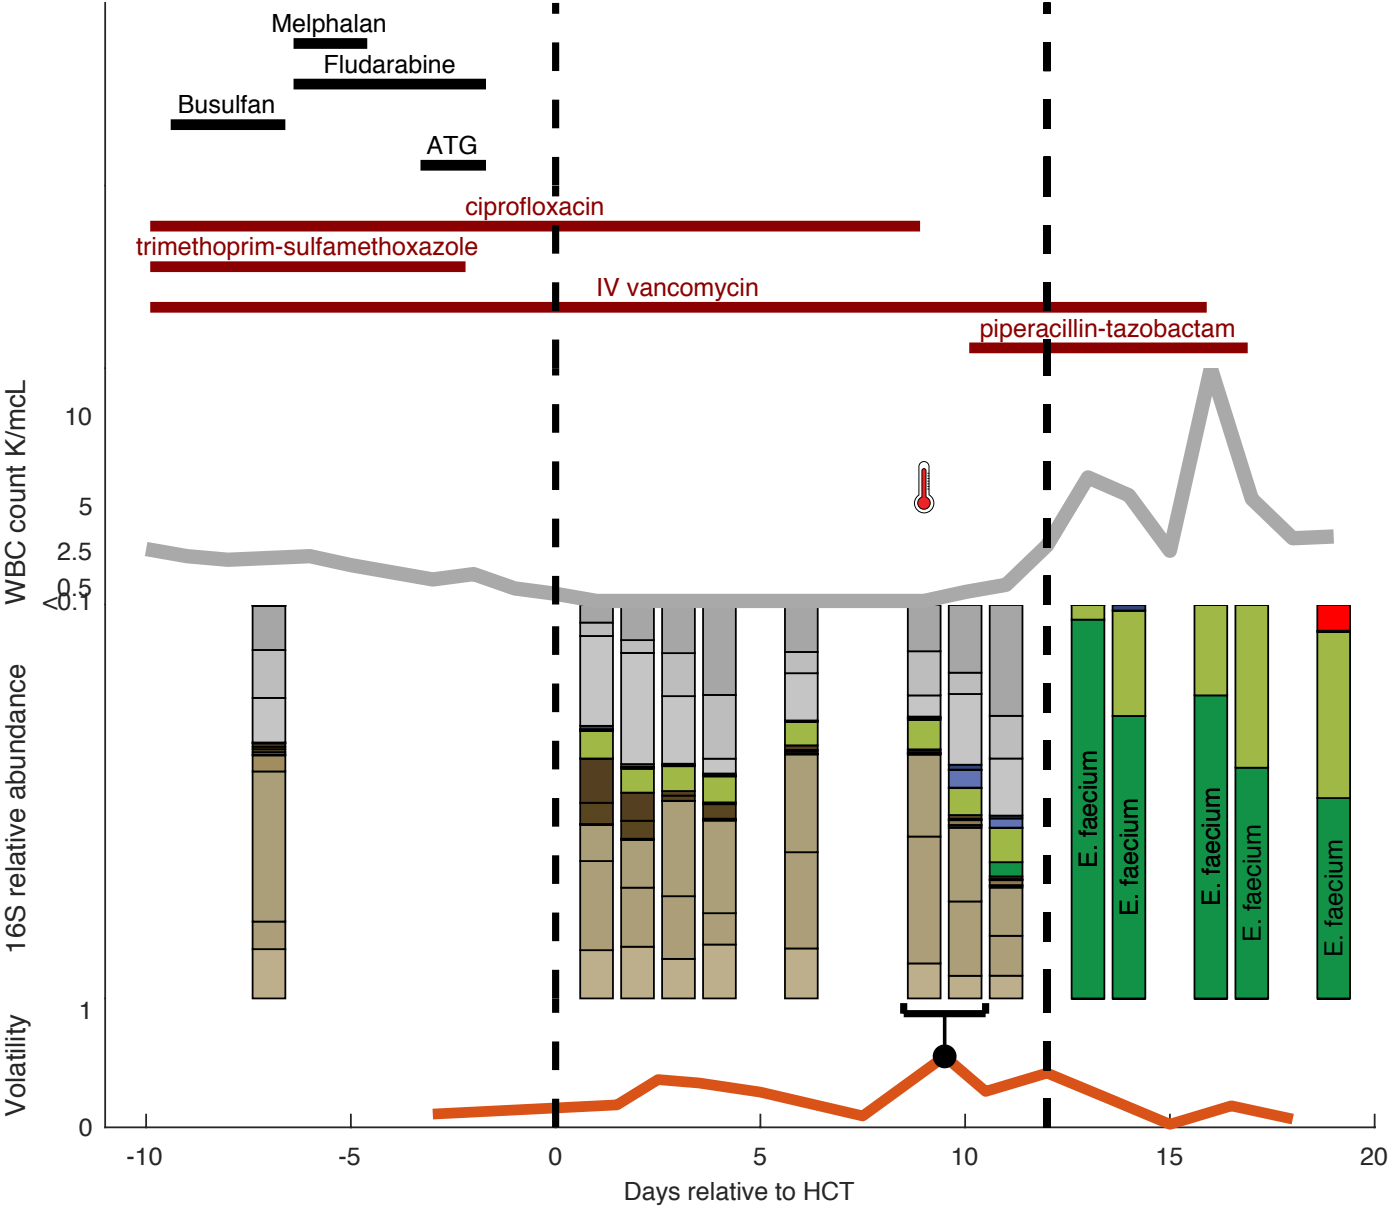

Supplement: IAI.00206-19-s0004.pdf [file IAI.00206-19-s0004.pdf]
