# Supplementary material for: Antibiotic-Induced Shifts in Fecal Microbiota Density and Composition during Hematopoietic Stem Cell Transplantation
Source: PubMed Central journal article supplement (PMC6704593; doi:10.1128/iai.00206-19), 2019-08-21

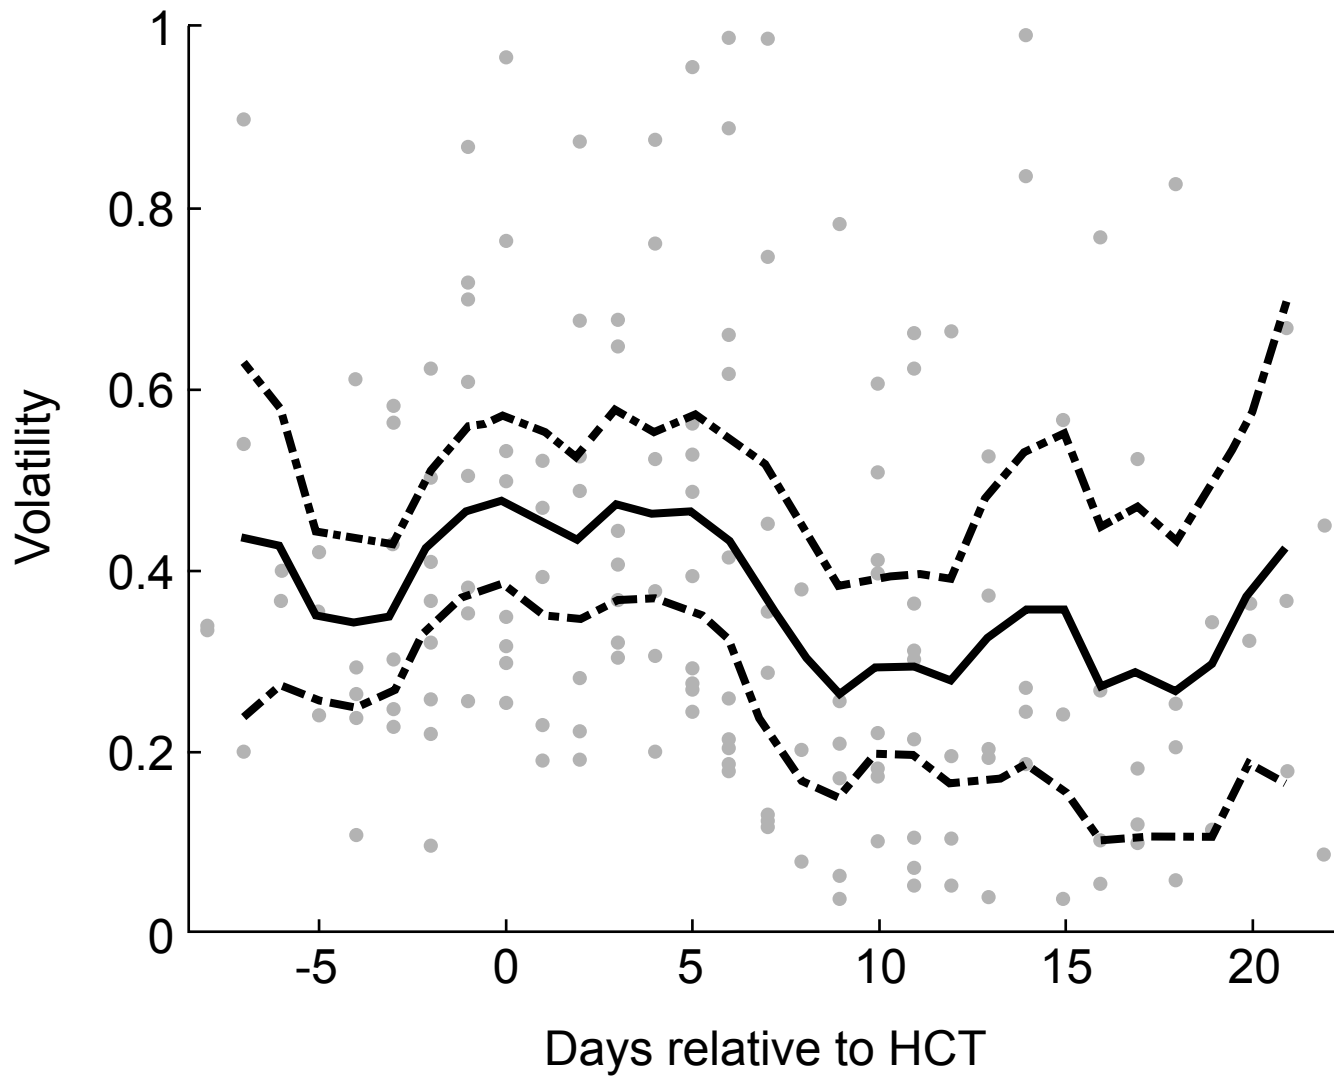

Supplement: IAI.00206-19-s0005.pdf [file IAI.00206-19-s0005.pdf]
