# Supplementary material for: Antibiotic-Induced Shifts in Fecal Microbiota Density and Composition during Hematopoietic Stem Cell Transplantation
Source: PubMed Central journal article supplement (PMC6704593; doi:10.1128/iai.00206-19), 2019-08-21
Supplement: IAI.00206-19-s0007.pdf [file IAI.00206-19-s0007.pdf]

Supplementary table 1: MCMC parameter estimate results (mean estimate, HDI5, HDI95,  $R_{\hat{}}$ ) for antibiotics, HCT phases and growth rates (intercepts) from 3 independent MCMC runs with 10,000 samples each.

|                                      | <b>mean estimate</b> | <b>5% of all MCMC samples less than</b> | <b>95% of all MCMC samples less than</b> | <b>Gelman-Rubin statistic (<math>R_{\hat{}}</math>)</b> |
|--------------------------------------|----------------------|-----------------------------------------|------------------------------------------|---------------------------------------------------------|
| <b>Growth rate</b>                   | 0.709                | -0.128                                  | 1.555                                    | 1.001                                                   |
| <b>Phase I</b>                       | -0.627               | -1.851                                  | 0.606                                    | 1.000                                                   |
| <b>Phase II</b>                      | -0.765               | -1.683                                  | 0.119                                    | 1.000                                                   |
| <b>piperacillin tazobactam</b>       | -0.928               | -1.739                                  | -0.073                                   | 1.000                                                   |
| <b>meropenem</b>                     | -1.015               | -2.307                                  | 0.407                                    | 1.000                                                   |
| <b>metronidazole</b>                 | -0.505               | -2.245                                  | 1.215                                    | 1.000                                                   |
| <b>cephalosporins (gen. 1-3)</b>     | -0.850               | -2.748                                  | 0.942                                    | 1.000                                                   |
| <b>vancomycin (PO)</b>               | -0.352               | -2.010                                  | 1.238                                    | 1.000                                                   |
| <b>cefepime</b>                      | -0.236               | -1.852                                  | 1.437                                    | 1.000                                                   |
| <b>linezolid</b>                     | 0.642                | -3.843                                  | 4.847                                    | 1.000                                                   |
| <b>fluoroquinolones</b>              | -0.081               | -0.764                                  | 0.575                                    | 1.000                                                   |
| <b>vancomycin</b>                    | -0.242               | -1.025                                  | 0.372                                    | 1.001                                                   |
| <b>trimethoprim-sulfamethoxazole</b> | -0.035               | -0.864                                  | 0.817                                    | 1.000                                                   |
| <b>atovaquone</b>                    | 0.383                | -0.732                                  | 1.651                                    | 1.001                                                   |
